# Supplementary material
Source: publisher site journal article supplement (https://www.spandidos-publications.com/3539/downloadSupplementary)

Figure S1. Absorption assay of mice sera. Mice sera were pre-incubated with 500  $\mu$ M B19V-VP1u or truncated B19V-VP1u proteins for 1 h at 37°C before ELISA was performed. Data are shown as the mean  $\pm$  SD. Similar results were obtained in three-repeated experiments. \*P<0.05. (n=4 for each group). B19V, B19 virus; VP1u, VP1-unique region; OD, optical density; comp, competitive ELISA (the absorption experiment was performed before ELISA).

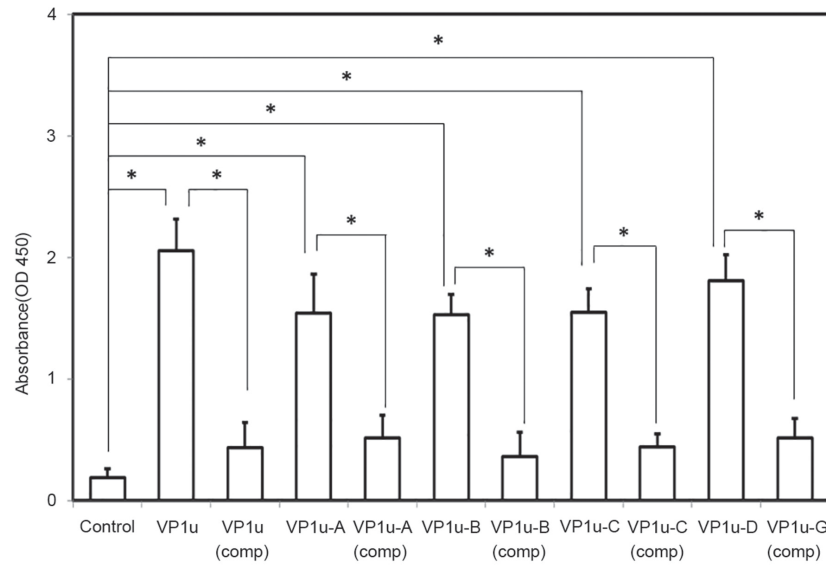

Supplement: Supplementary file 1 [file downloadSupplementary]
